# Supplementary material for: Chloroplast Pan-Genomes and Comparative Transcriptomics Reveal Genetic Variation and Temperature Adaptation in the Cucumber
Source: MDPI journal article supplement (doi:10.3390/ijms24108943), 2023-05-18
Supplement: s1 [file s1]

# Chloroplast Pan-Genomes and Comparative Transcriptomics Reveal Genetic Variation and Temperature Adaptation in the Cucumber

Lei Xia <sup>1</sup>, Han Wang <sup>1</sup>, Xiaokun Zhao <sup>1</sup>, Hesbon Ochieng Obel <sup>1</sup>, Xiaqing Yu <sup>1</sup>, Qunfeng Lou <sup>1</sup>, Jinfeng Chen <sup>1,\*</sup>, and Chunyan Cheng <sup>1,\*</sup>

<sup>1</sup>National Key Laboratory of Crop Genetics & Germplasm Enhancement and Utilization, College of Horticulture, Nanjing Agricultural University, Nanjing 210095, China

\*Correspondence: jfchen@njau.edu.cn; Tel.: +86-025-8439-6370

\*Correspondence: chunyancheng@njau.edu.cn; Tel.: +86-025-8439-6370

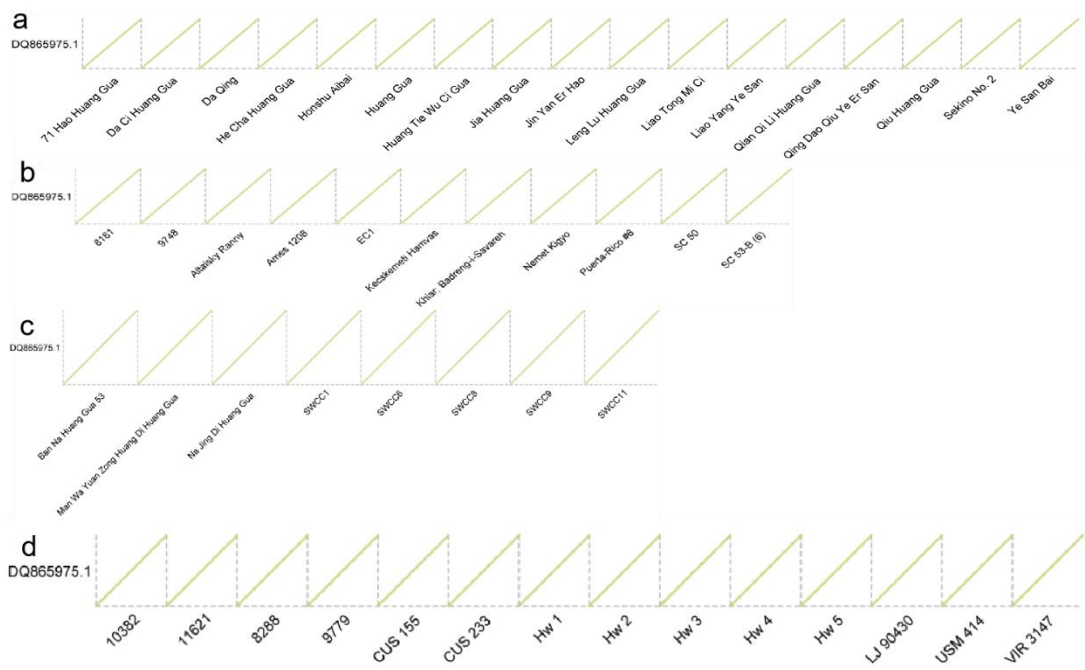

Figure S1. Co-linearity analysis of our assembled chloroplast genome with “GY14” reference chloroplast genome (DQ865975.1).

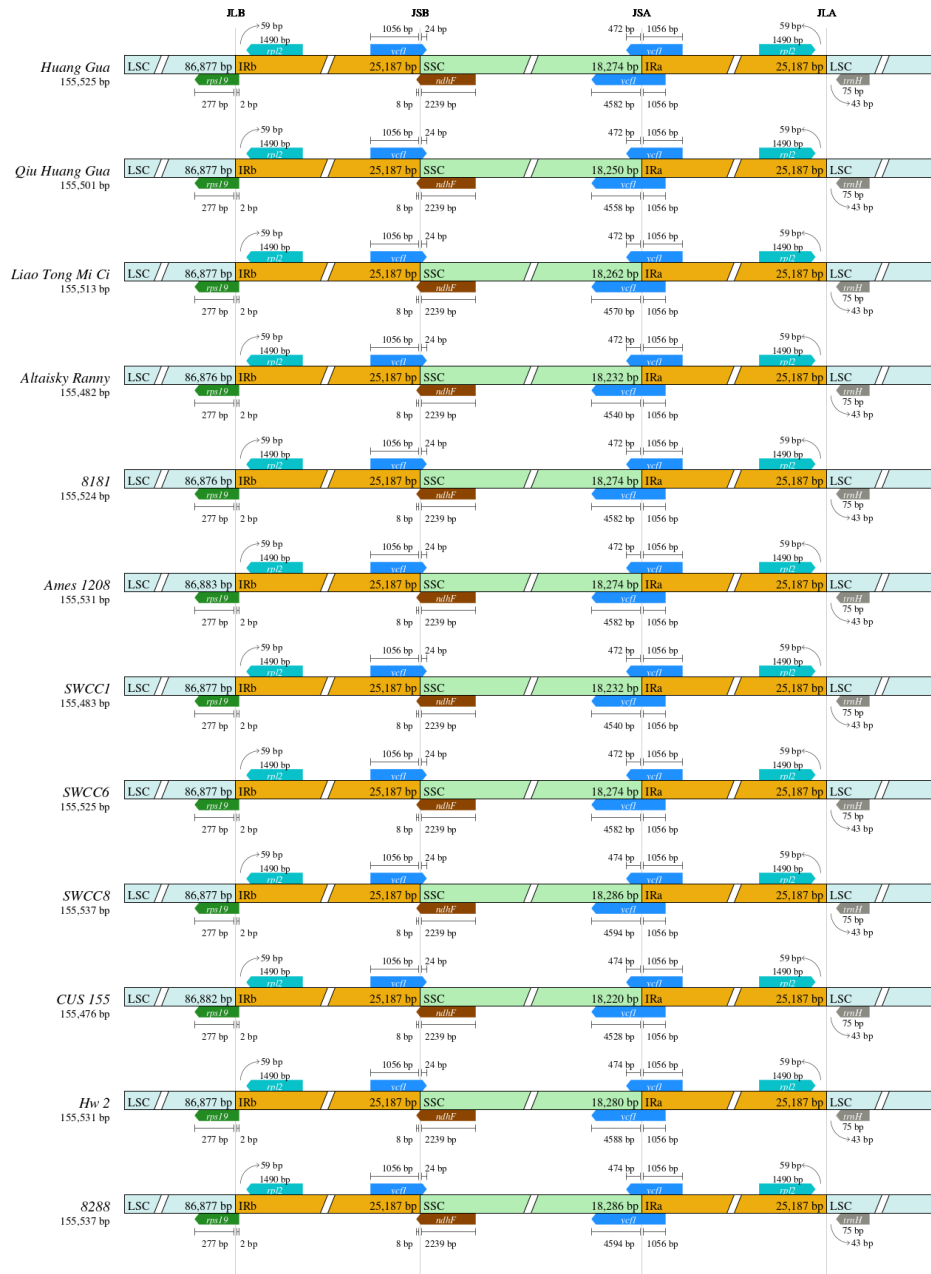

Figure S2. Comparison of the borders of the LSC, SSC, and IR regions in different ecotype cucumbers.

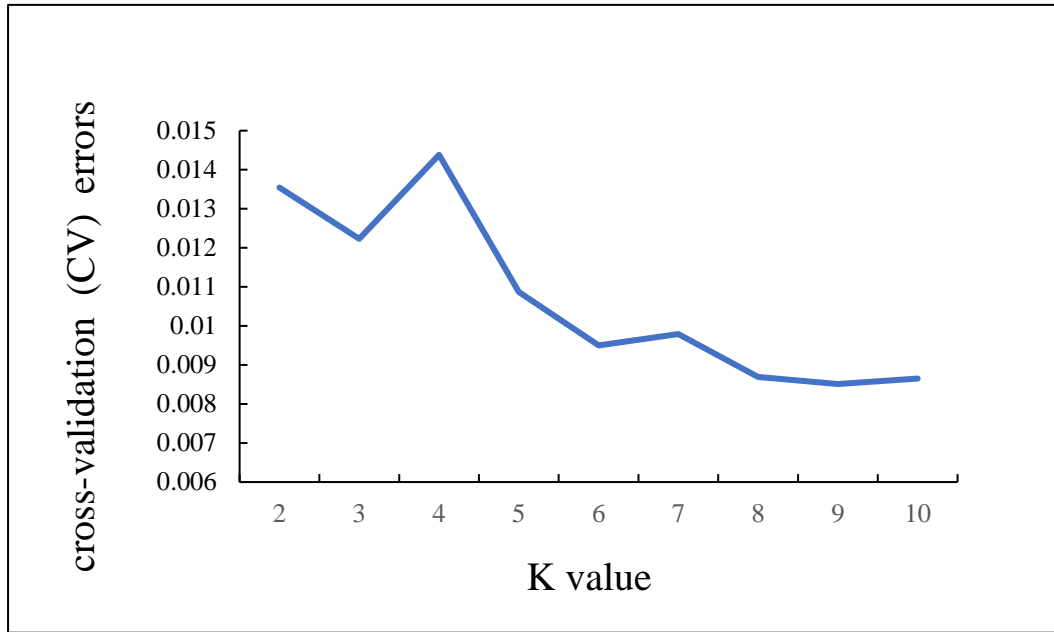

Figure S3. The CV error with different K value.

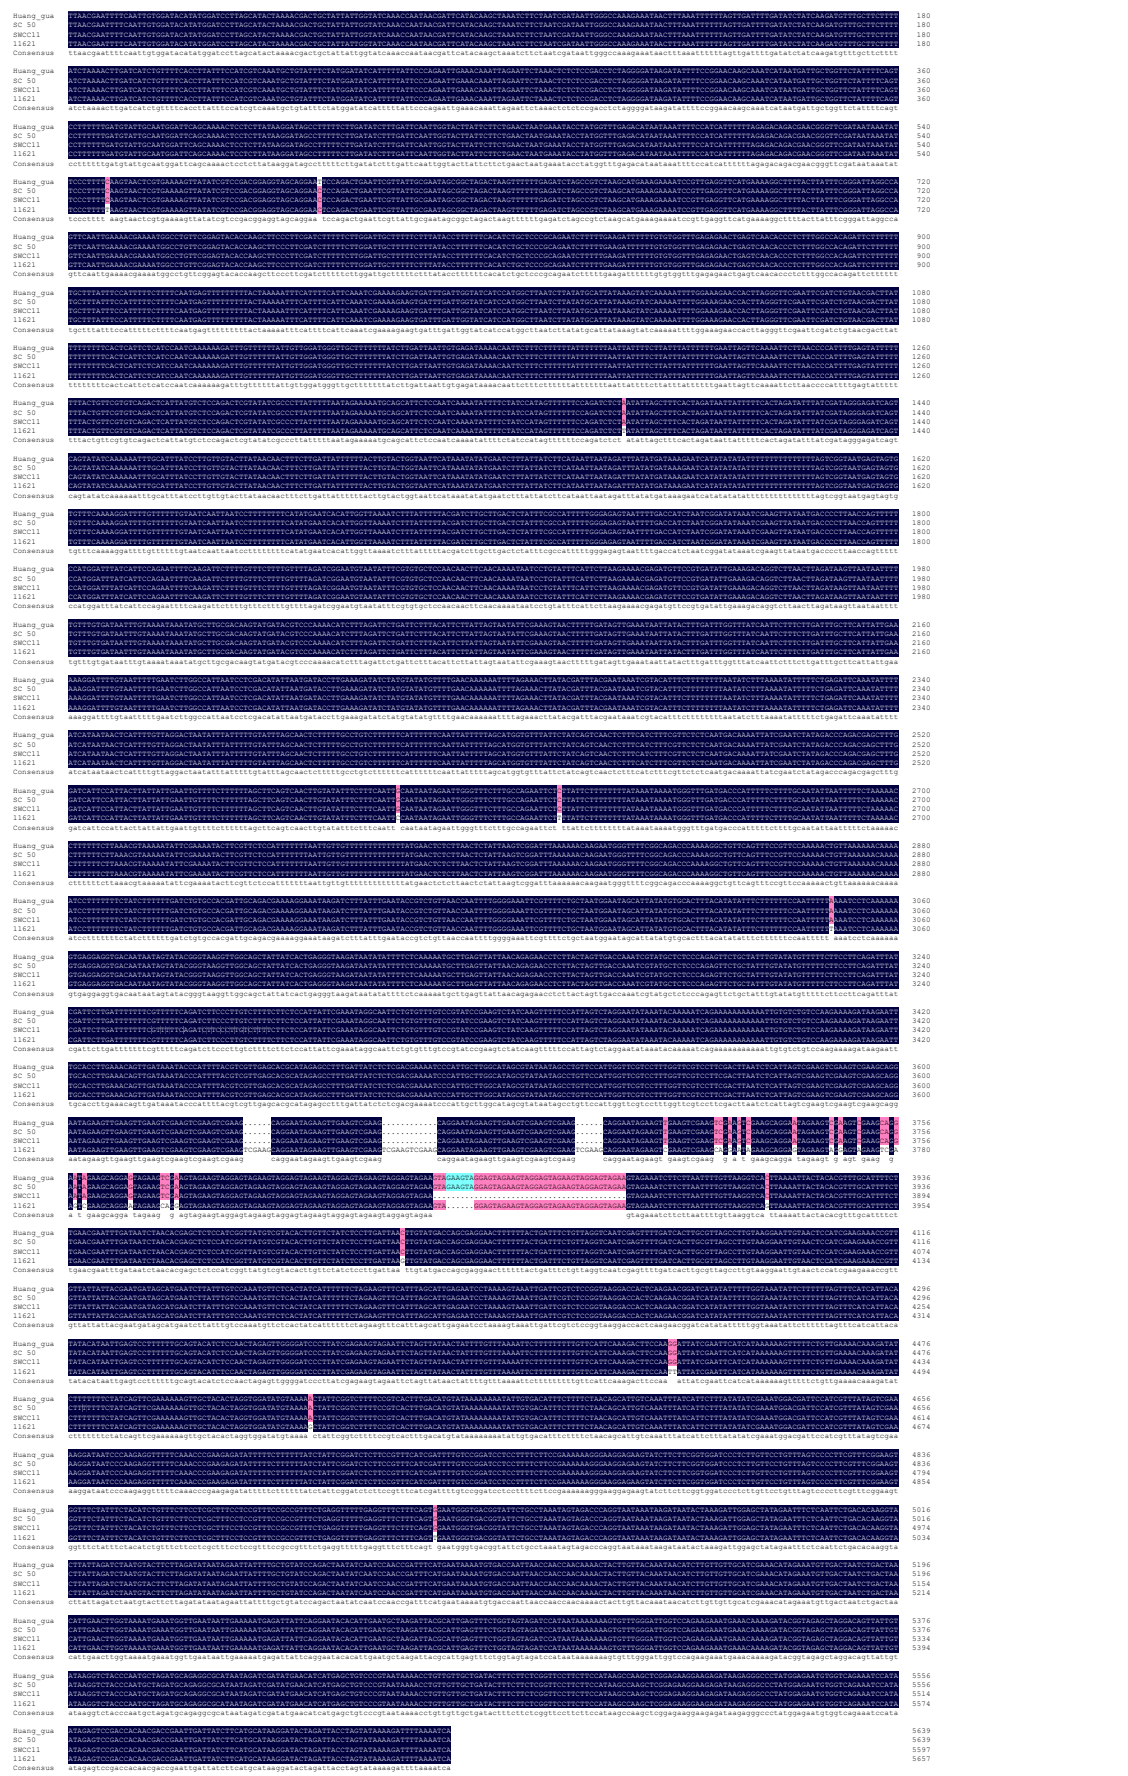

Figure S4. The differences in ycf1 coding sequence of Huang gua (East Asian), SC 50 (Eurasian),

SWCC11 (Xishuangbanna) and 11621 (Indian).

Table S10. The SRR number, Genebank accession number and corresponding ecological type of cucumber varieties used in this study.

| Samples                          | SRRNumebr   | Ecotype       | Genebank<br>accession number |
|----------------------------------|-------------|---------------|------------------------------|
| DaQing7314-2-6-1-1               | SRR543220   | EastAsian     | OQ675040                     |
| LiaoTongMiCi                     | SRR543221   | EastAsian     | OQ675041                     |
| HuangTieWuCiGua                  | SRR543222   | EastAsian     | OQ675042                     |
| HeChaHuangGua                    | SRR543223   | EastAsian     | OQ675043                     |
| QianQiLiHuangGua                 | SRR543224   | EastAsian     | OQ675044                     |
| YeSanBai                         | SRR543225   | EastAsian     | OQ675045                     |
| LiaoYangYeSan                    | SRR543226   | EastAsian     | OQ675046                     |
| JiaHuangGua                      | SRR543229   | EastAsian     | OQ675047                     |
| HuangGua                         | SRR543230   | EastAsian     | OQ675048                     |
| QingDaoQiuYeErSan                | SRR543231   | EastAsian     | OQ675049                     |
| HonshuAibai                      | SRR543238   | EastAsian     | OQ675050                     |
| SekinoNo.2(OchiaiNo.2)           | SRR543239   | EastAsian     | OQ675051                     |
| DaCiHuangGua                     | SRR543242   | EastAsian     | OQ675052                     |
| QiuHuangGua                      | SRR543243   | EastAsian     | OQ675053                     |
| LengLuHuangGua                   | SRR543244   | EastAsian     | OQ675054                     |
| 71HaoHuangGua                    | SRR543245   | EastAsian     | OQ675055                     |
| JinYanErHao                      | SRR543267   | EastAsian     | OQ675061                     |
| NemetKigyo                       | SRR543254   | Eurasian      | OQ675056                     |
| KecskemetiHamvas                 | SRR543255   | Eurasian      | OQ675057                     |
| AltaiskyRanny(AltaiskiRannii166) | SRR543260   | Eurasian      | OQ675058                     |
| Ames1208                         | SRR543262   | Eurasian      | OQ675059                     |
| 8181                             | SRR543266   | Eurasian      | OQ675060                     |
| Puerta-Rico#6                    | SRR543268   | Eurasian      | OQ675062                     |
| SC53-B(6)                        | SRR543270   | Eurasian      | OQ675063                     |
| SC50                             | SRR543272   | Eurasian      | OQ675064                     |
| Khiar;Badreng-i-Savareh          | SRR543277   | Eurasian      | OQ675065                     |
| 9748                             | SRR543280   | Eurasian      | OQ675066                     |
| EC1                              | SRR11300861 | Eurasian      | OQ675036                     |
| BanNaHuangGua53                  | SRR543310   | Xishuangbanna | OQ675037                     |
| ManWaYuanZongHuangDiHuangGua     | SRR543311   | Xishuangbanna | OQ675038                     |
| NaJingDiHuangGua1                | SRR543313   | Xishuangbanna | OQ675039                     |
| SWCC1                            | SRR23913619 | Xishuangbanna | OQ675081                     |
| SWCC6                            | SRR23913618 | Xishuangbanna | OQ675082                     |
| SWCC8                            | SRR23913617 | Xishuangbanna | OQ675083                     |
| SWCC9                            | SRR23913616 | Xishuangbanna | OQ675084                     |
| SWCC11                           | SRR23913615 | Xishuangbanna | OQ675085                     |
| LJ90430                          | SRR543203   | Indian        | OQ675067                     |
| 11621                            | SRR543204   | Indian        | OQ675068                     |

|         |           |        |          |
|---------|-----------|--------|----------|
| VIR3147 | SRR543207 | Indian | OQ675069 |
| Hw1     | SRR543208 | Indian | OQ675070 |
| Hw2     | SRR543209 | Indian | OQ675071 |
| Hw3     | SRR543210 | Indian | OQ675072 |
| Hw4     | SRR543211 | Indian | OQ675073 |
| Hw5     | SRR543212 | Indian | OQ675074 |
| CUS233  | SRR543213 | Indian | OQ675075 |
| CUS155  | SRR543214 | Indian | OQ675076 |
| USM414  | SRR543288 | Indian | OQ675077 |
| 10382   | SRR543289 | Indian | OQ675078 |
| 9779    | SRR543295 | Indian | OQ675079 |
| 8288    | SRR543298 | Indian | OQ675080 |
